# Supplementary material for: Charge transfer dynamics in noble gas endofullerenes: intra- and extramolecular tunnelling
Source: Royal Society of Chemistry journal article supplement (doi:10.1039/d5na00727e), 2025-01-01
Supplement: d5na00727e1.pdf [file d5na00727e1.pdf]

# Supplementary Information – Charge transfer dynamics in noble gas endofullerenes: intra- & extramolecular tunnelling

Ali Sufyan *et al.*  
July 28, 2025

## Raw data

Please note that all raw data are available via the University of Nottingham  
Data Management Repository, DOI: 10.17639/nott.7585.

## Supplementary Data – DFT and STS

Table S1: Energy (in eV) of different C<sub>60</sub>/Pb(111) adsorption sites and  
molecular rotations.

| Configuration | Rotations (deg.) | E (eV)    |            |            |
|---------------|------------------|-----------|------------|------------|
|               |                  | On-top    | hcp-hollow | fcc-hollow |
| atom-down     | 0                | -899.1516 | -899.1369  | -899.1209  |
|               | 30               | -899.1869 | -899.0752  | -899.1562  |
|               | 60               | -899.1431 | -899.1425  | -899.1272  |
|               | 90               | -899.1338 | -899.1115  | -899.1260  |
| 6-6 Bond down | 0                | -899.1581 | -899.1245  | -899.1015  |
|               | 30               | -899.1587 | -899.1122  | -899.1230  |
|               | 60               | -899.1593 | -899.0986  | -899.1014  |
|               | 90               | -899.1192 | -899.1286  | -899.1431  |
| pentagon down | 0                | -899.1241 | -899.1401  | -899.1473  |
|               | 30               | -899.1361 | -899.1212  | -899.1051  |
|               | 60               | -899.1297 | -899.1260  | -899.1441  |
|               | 90               | -899.1812 | -899.1026  | -899.1190  |
| hexagon down  | 0                | -899.0362 | -899.1480  | -899.1788  |
|               | 30               | -899.1360 | -899.1129  | -899.1484  |
|               | 60               | -899.0630 | -899.1240  | -899.1509  |
|               | 90               | -899.1575 | -899.1267  | -899.1341  |

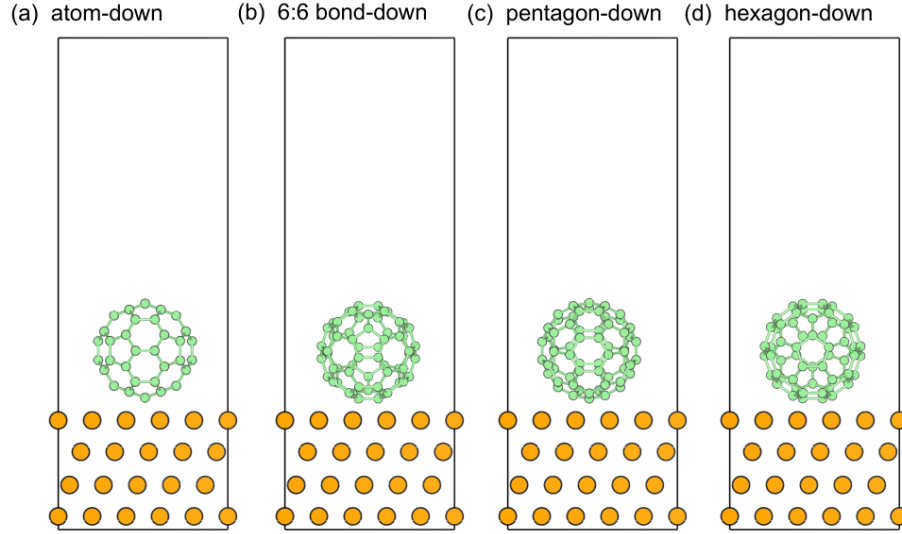

Figure S1: Side view of  $C_{60}$  adsorption on the Pb(111) substrate for various orientations: (a) atom-down, (b) 6:6 bond-down, (c) pentagon-down, and (d) hexagon-down.

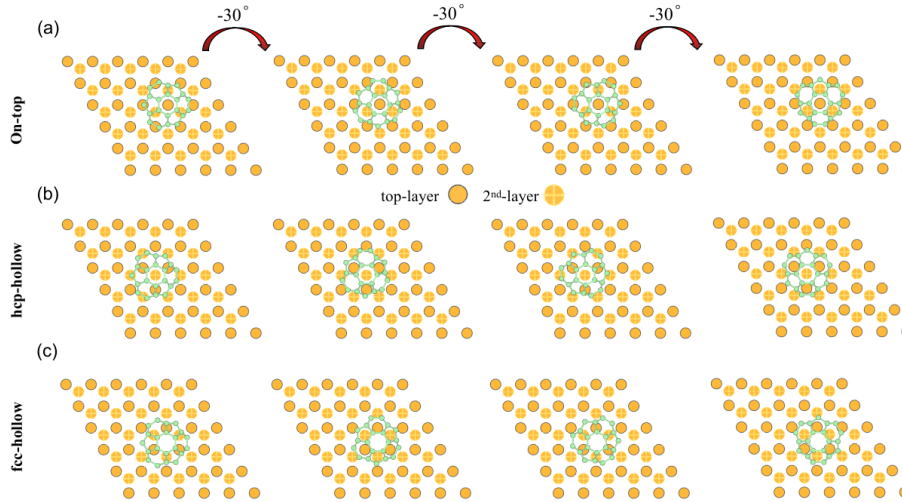

Figure S2: Top view illustrating the atom-down orientation of  $C_{60}$  on the Pb(111) substrate for various adsorption sites and rotations. (a) On-top site, (b) hcp-hollow site, and (c) fcc-hollow site. For each site, the  $C_{60}$  molecule is shown at rotations of  $0^\circ$ ,  $30^\circ$ ,  $60^\circ$ , and  $90^\circ$  (from left to right). The orange circles represent Pb atoms (top-layer: orange, 2nd-layer: highlighted orange), and the green circles indicate the lowest C atoms of  $C_{60}$  molecule.

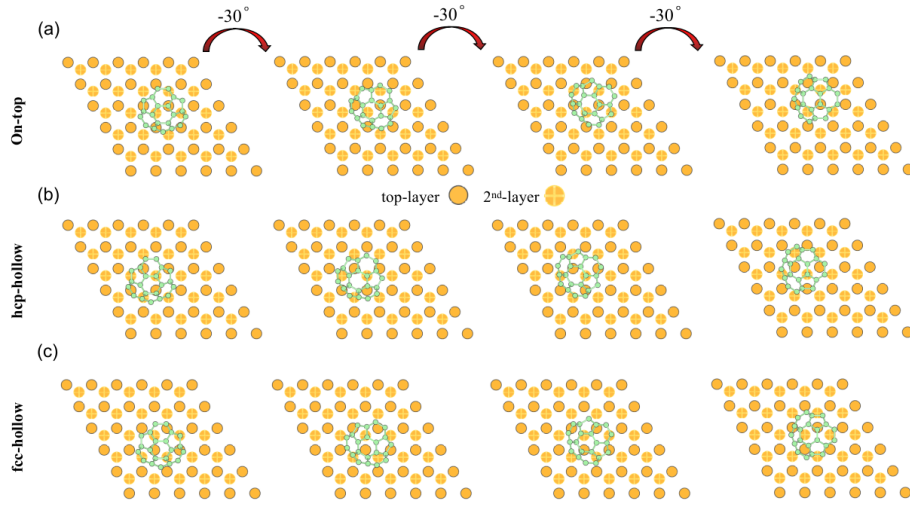

Figure S3: Top view illustrating the 6:6 bond-down orientation of  $C_{60}$  on the Pb(111) substrate for various adsorption sites and rotations. (a) On-top site, (b) hcp-hollow site, and (c) fcc-hollow site. For each site, the  $C_{60}$  molecule is shown at rotations of  $0^\circ$ ,  $30^\circ$ ,  $60^\circ$ , and  $90^\circ$  (from left to right). The orange circles represent Pb atoms (top-layer: orange, 2nd-layer: highlighted orange), and the green circles indicate the lowest C atoms of  $C_{60}$  molecule.

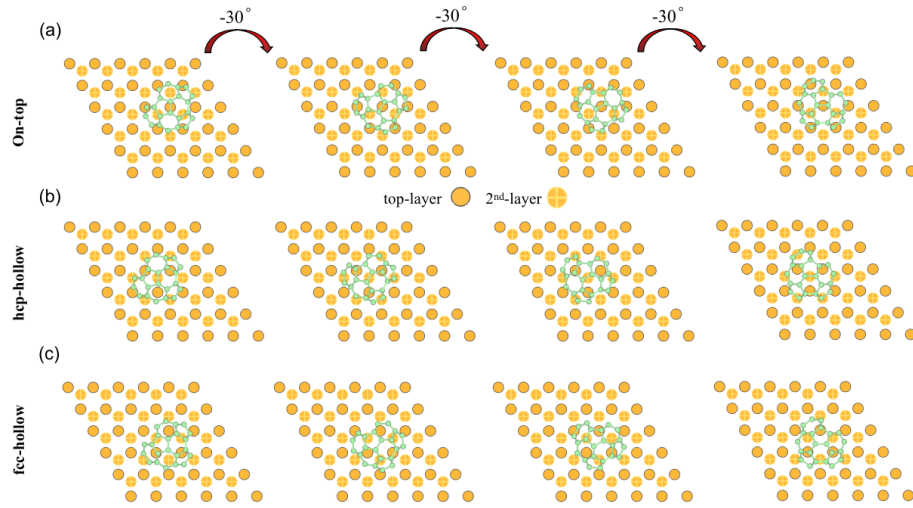

Figure S4: Top view illustrating the pentagon-down orientation of  $C_{60}$  on the Pb(111) substrate for various adsorption sites and rotations. (a) On-top site, (b) hcp-hollow site, and (c) fcc-hollow site. For each site, the  $C_{60}$  molecule is shown at rotations of  $0^\circ$ ,  $30^\circ$ ,  $60^\circ$ , and  $90^\circ$  (from left to right). The orange circles represent Pb atoms (top-layer: orange, 2nd-layer: highlighted orange), and the green circles indicate the lowest C atoms of  $C_{60}$  molecule.

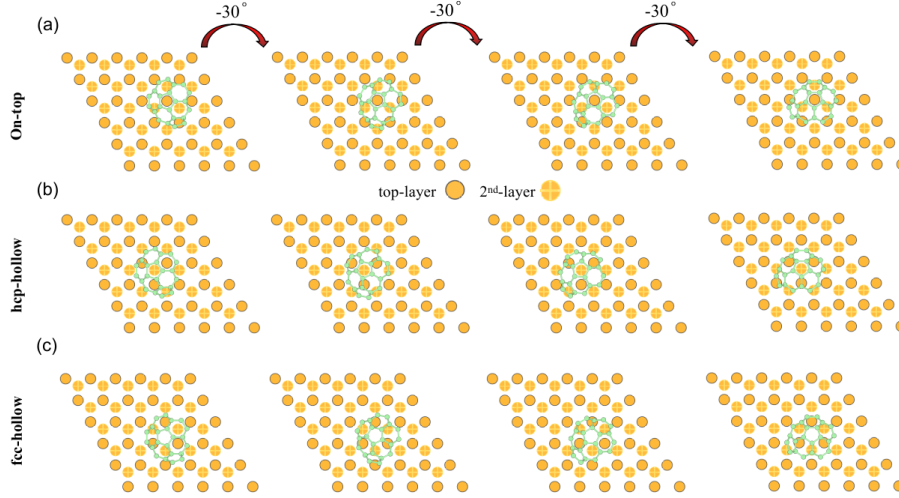

Figure S5: Top view illustrating the hexagon-atom orientation of  $C_{60}$  on the Pb(111) substrate for various adsorption sites and rotations. (a) On-top site, (b) hcp-hollow site, and (c) fcc-hollow site. For each site, the  $C_{60}$  molecule is shown at rotations of  $0^\circ$ ,  $30^\circ$ ,  $60^\circ$ , and  $90^\circ$  (from left to right). The orange circles represent Pb atoms (top-layer: orange, 2nd-layer: highlighted orange), and the green circles indicate the lowest C atoms of  $C_{60}$  molecule.

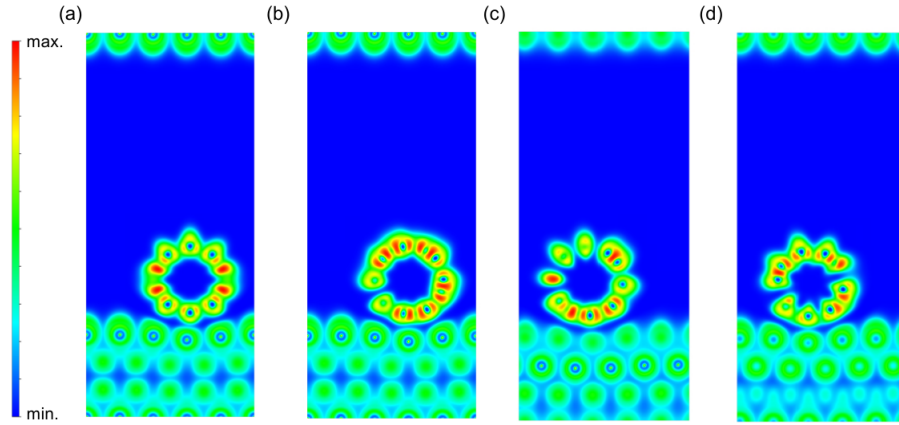

Figure S6: Electron Localization Function (ELF) plots showing the interaction between  $C_{60}$  and the Pb(111) substrate for various configurations. (a) Atom-down  $C_{60}$  with  $30^\circ$  rotation on an on-top site. (b) 6:6 bond-down  $C_{60}$  with  $60^\circ$  rotation on an on-top site. (c) Pentagon-down  $C_{60}$  with  $90^\circ$  rotation on an on-top site. (d) Hexagon-down  $C_{60}$  with  $0^\circ$  rotation on an fcc-hollow site. The color scale on the left indicates the ELF value, from minimum (blue) to maximum (red).

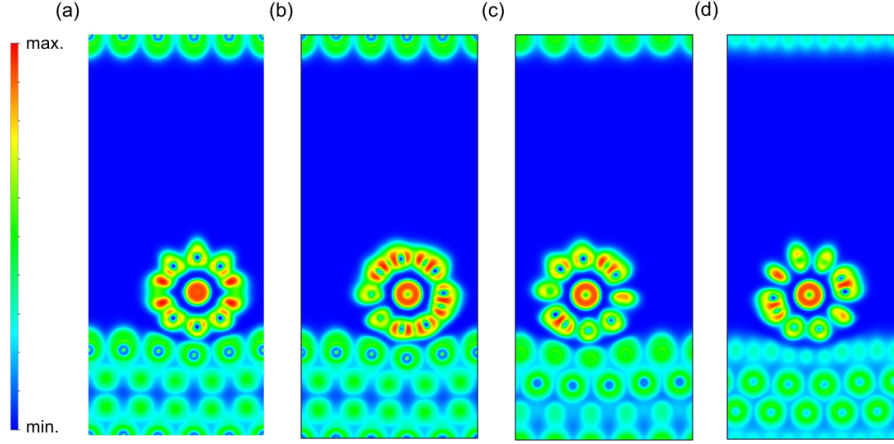

Figure S7: Electron Localization Function (ELF) plots showing the interaction between  $\text{Kr@C}_{60}$  and the  $\text{Pb}(111)$  substrate for various configurations. (a) Atom-down  $\text{Kr@C}_{60}$  with  $30^\circ$  rotation on an on-top site. (b) 6:6 bond-down  $\text{Kr@C}_{60}$  with  $60^\circ$  rotation on an on-top site. (c) Pentagon-down  $\text{Kr@C}_{60}$  with  $90^\circ$  rotation on an on-top site. (d) Hexagon-down  $\text{Kr@C}_{60}$  with  $0^\circ$  rotation on an fcc-hollow site. The color scale on the left indicates the ELF value, from minimum (blue) to maximum (red).

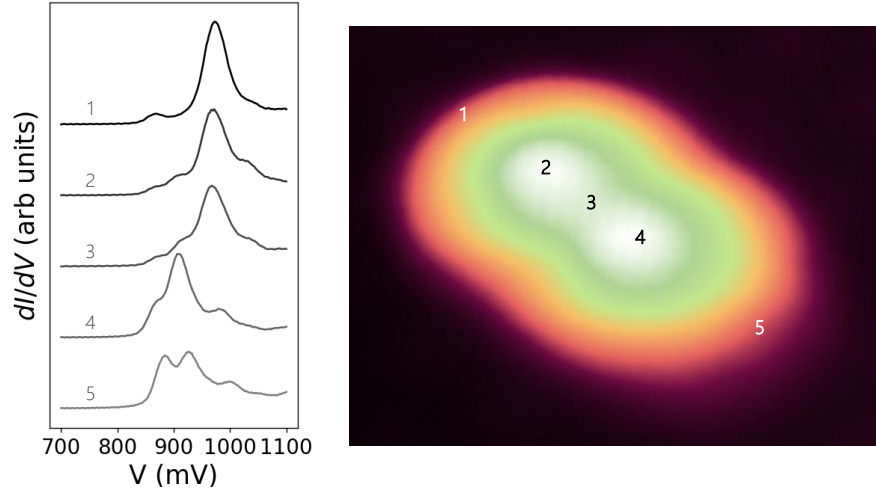

Figure S8: Set of  $dI/dV$  spectra measured across a  $\text{Kr@C}_{60}$  van der Waals dimer adsorbed on top of a complete  $\text{Kr@C}_{60}$  layer. Note extensive variation in lineshape as a function of tip position.
